# Supplementary material for: Overweight in adult cats: a cross-sectional study
Source: Springer Nature journal article supplement (doi:10.1186/s13028-018-0359-7), 2018-01-19
Supplement: 13028_2018_359_MOESM1_ESM.pdf [file 13028_2018_359_MOESM1_ESM.pdf]

**Additional file 1.** Results from the final models from the logistic regression analyses from the medical records cohort (n = 1072) and the questionnaire cohort (n = 1665). Odds ratios (OR) including 95% confidence intervals (CI), and P values, are shown for all significant variables.

| Variables                         | Medical records cohort (n = 1072) |          | Questionnaire cohort (n = 1665) |          |
|-----------------------------------|-----------------------------------|----------|---------------------------------|----------|
|                                   | OR (95% CI)                       | P value  | OR (95% CI)                     | P value  |
| <b>Breed</b>                      |                                   | 0.0009   |                                 | 0.0033   |
| Birman versus Domestic            | 0.12 (0.04–0.34)                  |          | 0.11 (0.03-0.43)                |          |
| British versus Domestic           | 1.96 (0.83–4.66)                  |          | n.a.                            |          |
| Cornish rex versus Domestic       | 0.77 (0.29–2.08)                  |          | n.a.                            |          |
| Maine coon versus Domestic        | 0.87 (0.46–1.64)                  |          | 0.83 (0.29-2.41)                |          |
| Norwegian versus Domestic         | 0.69 (0.37–1.29)                  |          | 0.42 (0.19-0.94)                |          |
| Other breeds vs Domestic          | 1.13 (0.75– 1.73)                 |          | 0.91 (0.59-1.41)                |          |
| Persian versus Domestic           | 0.27 (0.10–0.74)                  |          | 0.40 (0.17-0.97)                |          |
| Ragdoll versus Domestic           | 1.04 (0.50–2.15)                  |          | n.a.                            |          |
| <b>Sex</b>                        |                                   | 0.0011   |                                 | 0.015    |
| Male versus Female                | 1.56 (1.20–2.03)                  |          | 1.35 (1.06-1.73)                |          |
| <b>Neutering</b>                  |                                   | 0.040    |                                 | n.s.     |
| Neutered versus Intact            | 1.42 (1.02–1.97)                  |          | n.s.                            |          |
| <b>Age group</b>                  |                                   | 0.0003   |                                 | 0.0007   |
| Junior versus Mature              | 0.53 (0.34–0.85)                  |          | n.a.                            |          |
| Prime versus Mature               | 0.65 (0.46– 0.93)                 |          | 0.31 (0.04-2.50)                |          |
| Senior versus Mature              | 0.72 (0.50–1.04)                  |          | 1.05 (0.73-1.49)                |          |
| Geriatric versus Mature           | 0.32 (0.19–0.54)                  |          | 0.61 (0.41-0.90)                |          |
| <b>Diagnosis/organs affected*</b> |                                   | < 0.0001 |                                 | n.a.     |
| Lower urinary tract               | 3.37 (1.98–5.74)                  |          | n.a.                            |          |
| Diabetes mellitus                 | 2.66 (1.08–6.57)                  |          | n.a.                            |          |
| Respiratory tract                 | 2.55 (1.36–4.81)                  |          | n.a.                            |          |
| Skin                              | 2.36 (1.33–4.19)                  |          | n.a.                            |          |
| Locomotor apparatus               | 1.95 (1.07–3.53)                  |          | n.a.                            |          |
| Neoplasia                         | 1.92 (0.99–3.71)                  |          | n.a.                            |          |
| Trauma                            | 1.57 (1.02–2.42)                  |          | n.a.                            |          |
| Digestive tract                   | 1.17 (0.77–1.76)                  |          | n.a.                            |          |
| Circulatory system                | 0.66 (0.31–1.43)                  |          | n.a.                            |          |
| Endocrine disease (excl. DM)      | 0.59 (0.24–1.46)                  |          | n.a.                            |          |
| Upper urinary system              | 0.57 (0.31–1.07)                  |          | n.a.                            |          |
| <b>Type of diet</b>               |                                   | n.a.     |                                 | 0.0031   |
| Dry versus Wet                    | n.a.                              |          | 2.40 (1.44-4.00)                |          |
| Mixed versus Wet                  | n.a.                              |          | 2.26 (1.37-3.72)                |          |
| <b>Activity</b>                   |                                   |          |                                 | < 0.0001 |
| Inactive versus Normal            | n.a.                              |          | 1.94 (1.50-2.52)                |          |
| Active versus Normal              | n.a.                              |          | 0.89 (0.50-1.58)                |          |
| <b>Eating behavior</b>            |                                   |          |                                 | < 0.0001 |
| Greedy versus Nibbles             | n.a.                              |          | 1.94 (1.40-2.68)                |          |
| Finishes in hours versus Nibbles  | n.a.                              |          | 0.92 (0.60-1.42)                |          |
| Picky versus Nibbles              | n.a.                              |          | 0.59 (0.34-1.03)                |          |

OR, odds ratio; CI, confidence interval; n.a., not applicable; n.s., not significant; DM, diabetes mellitus. \* Diagnostic code group versus a diagnosis referring to the whole animal.
